# Supplementary material for: Rapid preparation of a Fe coordination structure adjustable ORR catalyst using microwaves with a half-wave potential above 0.9 V
Source: Royal Society of Chemistry journal article supplement (doi:10.1039/d4qi00952e), 2024-01-01
Supplement: d4qi00952e1.pdf [file d4qi00952e1.pdf]

## Supporting Information

### **Rapid preparation of Fe coordination structure adjustable ORR catalyst by microwave with a half-wave potential above 0.9 V**

**Qingtao Wang <sup>a,\*</sup>, Xia Hu <sup>a</sup>, Kai Cui <sup>b</sup>, Yanxia Wu <sup>a</sup>, Guofu Ma <sup>a</sup>, Ziqiang Lei <sup>a</sup>,**

**Shufang Ren <sup>c,\*</sup>**

a Key Laboratory of Eco-functional Polymer Materials of the Ministry of Education,  
Key Laboratory of Eco-environmental Polymer Materials of Gansu Province, College  
of Chemistry and Chemical Engineering, Northwest Normal University, Lanzhou  
730070, China

b College of Chemistry and Chemical Engineering, Lanzhou University, Lanzhou,  
730000, China

c Key Laboratory of Evidence Science Research and Application of Gansu Province,  
Gansu University of Political Science and Law, Lanzhou 730070, China

Qingtao Wang: wangqt@nwnu.edu.cn

Shufang Ren: rsf@gsupl.edu.cn

**Characterizations:** The structure of the samples were tested by PANalytical X'Pert PRO X-ray diffractometer (Cu K $\alpha$ ,  $\lambda=1.5418 \text{ \AA}$ ). The morphology of the samples were observed through TEM (FEI Tecnai G2 F30) and SEM (Zeiss ULTRA plus). The aberration-corrected high-angle annular darkfield scanning transmission electron microscopy (HAADF-STEM) images were obtained by using a FEI Titan Cubed Themis G2 300 TEM, equipped with a probe spherical aberration corrector. The XAFS spectra were obtained at the 1W1B station of the Beijing Synchrotron Radiation Facility.

**Electrochemical Measurements:** All electrochemical evaluations were performed using a three-electrode system controlled by a PGSTAT128N electrochemical station. A glassy carbon rotating disk electrode (RDE) with a diameter of 5 mm was used as the working electrode. Convert all measured potentials to a reversible hydrogen electrode (RHE) potential by the Nernst equation:  $E \text{ (RHE)} = E \text{ (Hg/HgO)} + 0.059 \text{ pH} + 0.098$ . An aqueous solution of 0.1 M KOH were used as the ORR electrolyte. The working electrode was manufactured as follows: catalysts (2 mg) were dispersed in a mixture solution of 980  $\mu\text{L}$  DMF and 20  $\mu\text{L}$  Nafion solution (5 wt.%). The mixture was sonicated for 30 min to form a homogeneous catalyst ink. Then, the catalyst ink (10  $\mu\text{L}$ ) was dropped on a 5 mm diameter glassy carbon RDE, and dried at room temperature to obtain a working electrode (mass loading about 0.1 mg  $\text{cm}^{-2}$ ). In all linear sweep voltammetry (LSV) electrochemical tests, the ORR measurements were carried out in O<sub>2</sub>-saturated 0.1 M KOH solutions at a scan rate of 5 mV s<sup>-1</sup>. The cyclic voltammetry (CV) experiments were performed in N<sub>2</sub>/O<sub>2</sub>-saturated electrolyte solutions with a scan rate of 50 mV s<sup>-1</sup>. The RDE measurement was performed at a scanning rate of 5 mV s<sup>-1</sup> at different speeds (400-2025 rpm). The number of electrons transferred ( $n$ ) and kinetic current density ( $J_K$ ) during ORR was calculated according to the Koutecky-Levich equation:

$$\frac{1}{J} = \frac{1}{J_L} + \frac{1}{J_K} = \frac{1}{B\omega^{\frac{1}{2}}} + \frac{1}{J_K} \quad (1)$$

$$B = 0.62nFC_0D_0^{2/3}V^{-1/6} \quad (2)$$

$$J_K = nFkC_0 \quad (3)$$

Where  $J$  is the measured current density,  $J_K$  and  $J_L$  are the kinetic and diffusion limiting current densities,  $\omega$  is the angular velocity ( $\omega=2\pi N$ ,  $N$  is the rotation speed),  $n$  is transferred electron number,  $F$  is the Faraday constant ( $96485 \text{ C mol}^{-1}$ ),  $C_0$  is the bulk concentration of  $\text{O}_2$  ( $1.2 \times 10^{-6} \text{ mol cm}^{-3}$ ),  $D_0$  is the diffusion coefficient of  $\text{O}_2$  in  $0.1 \text{ M KOH}$  ( $1.9 \times 10^{-5} \text{ cm}^2 \text{ s}^{-1}$ ), and  $\nu$  is the kinematic viscosity of the electrolyte ( $0.01 \text{ cm}^2 \text{ s}^{-1}$ ).

**Zn-air batteries tests.** The assembly of Zn-air battery used polished Zn plate as the anode,  $\text{Fe}_{\text{NC}}/\text{Fe-N}_5\text{-C}$  coated carbon paper/gas diffusion layer/Ni foam as the cathode (mass loading:  $1.0 \text{ mg cm}^{-2}$ ), and  $6.0 \text{ M KOH} + 0.2 \text{ M ZnCl}_2$  as the electrolyte. For comparison,  $20 \text{ wt.}\%$  Pt/C was used to prepare the contrast electrode. All Zn-air batteries were tested under ambient atmosphere at  $25 \text{ }^\circ\text{C}$  with PGSTAT128N electrochemical working station and LANHE battery test system (CT2001A, Wuhan LAND electronic Co. Ltd., China).

**Density Functional Theory (DFT) Calculations.** First-principles calculations were performed using the Vienna Ab Initio Calculation Software Package [1, 2]. Based on density functional theory, commutative association functional use Perdew-Burke-Ernzerh in Generalized Gradient Approximation. The valence electron wave function is spread out by plane wave, and other electrons are approximated with a frozen core, and the plane wave truncation energy is  $400 \text{ eV}$  [3]. The computational model uses  $7 \times 4 \times 1$  supercells, and the Brillouin zone sampling uses a  $\Gamma$ -centric grid. The conjugate gradient minimization algorithm is used in the calculation [4], The atomic coordinates are structurally optimized so that the force acting on each atom does not exceed  $0.05 \text{ eV } \text{\AA}^{-1}$ .

The change of the Gibbs free energy ( $\Delta G$ ) for each elementary step at the zero potential can be written as:

$$\Delta G_{(0)} = \Delta E + \Delta E_{ZPE} - T\Delta S$$

Where  $E$  is the energy that can be directly obtained from the DFT calculations.  $E_{ZPE}$  is the zero-point energy that can be calculated using  $E_{ZPE} = 1/2\sum h\nu$ , in which  $\nu$  is the vibrational frequency of a normal mode and  $h$  is the Planck constant.  $S$  is the entropy that can be calculated as:

$$S(T) = k_B \sum_i \left( \frac{h\nu_i}{k_B T} \frac{1}{\exp\left(\frac{h\nu_i}{k_B T} - 1\right)} - \ln \left( 1 - \exp\left(\frac{h\nu_i}{k_B T} - 1\right) \right) \right)$$

$k_B$  and  $\nu_i$  are the Boltzmann constant and vibrational frequency, respectively.

## Supplementary Figures:

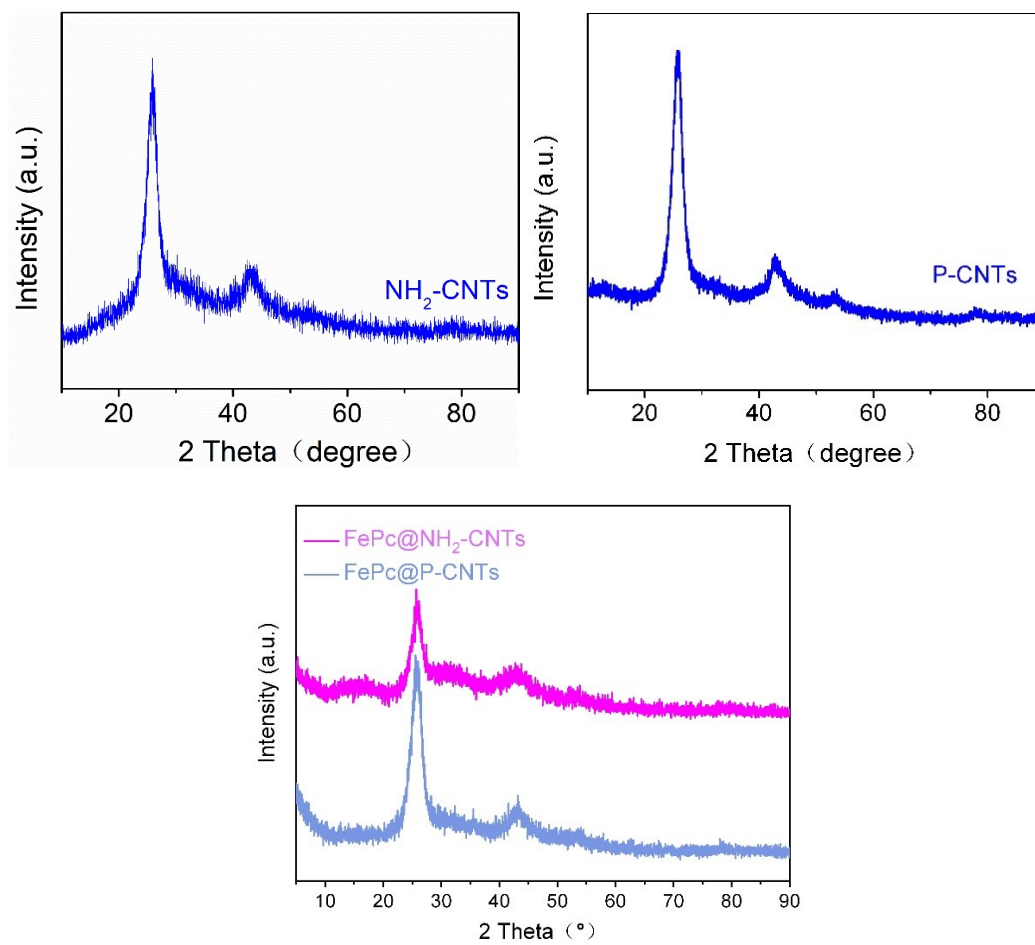

Figure S1. XRD patterns of  $\text{NH}_2\text{-CNTs}$ ,  $\text{P-CNTs}$ ,  $\text{FePc@NH}_2\text{-CNTs}$  and  $\text{FePc@P-CNTs}$ .

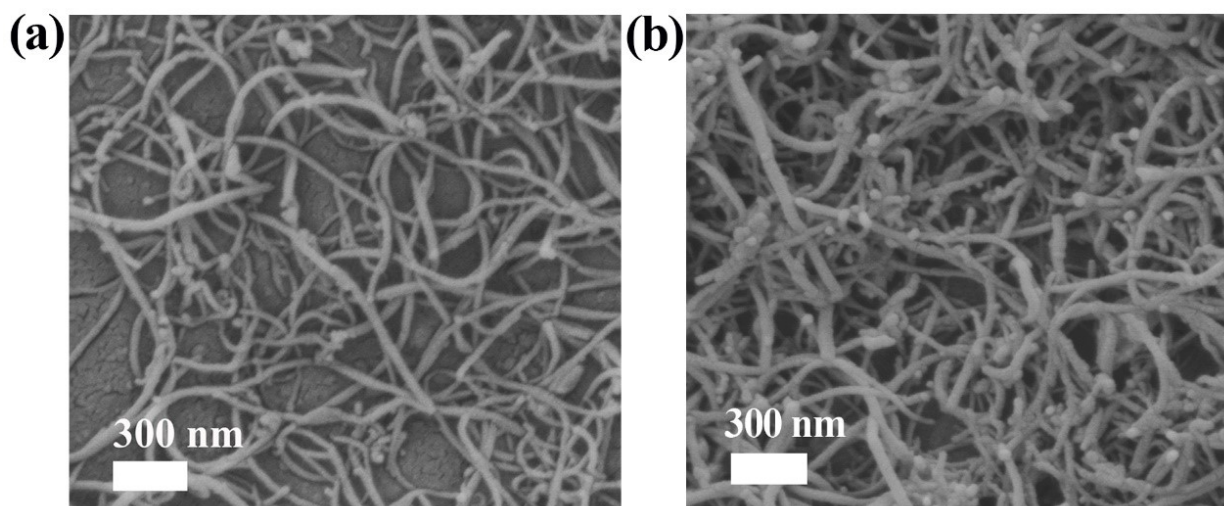

Figure S2. SEM images of (a)  $\text{Fe}_{\text{NC}}/\text{Fe-N}_5\text{-C}$  and (b)  $\text{Fe}_{\text{NC}}/\text{Fe-N}_4\text{-C}$ .

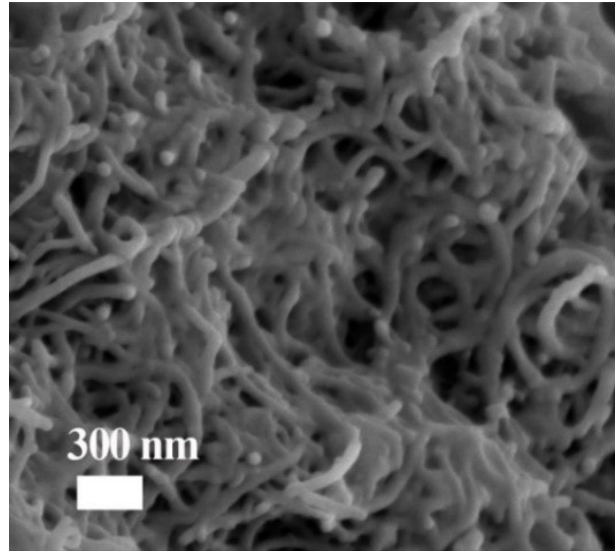

**Figure S3.** SEM image of  $\text{NH}_2\text{-CNTs}$ .

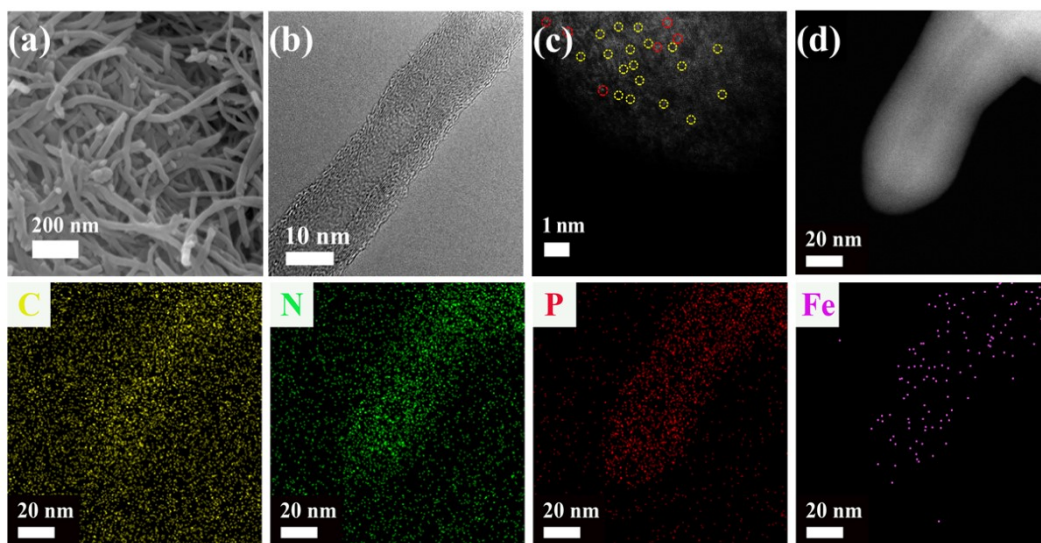

**Figure S4.** (a) SEM image and (b) TEM image of  $\text{Fe}_{\text{NC}}/\text{Fe-P-N}_4\text{-C}$ . (c) AC HAADF-STEM image of  $\text{Fe}_{\text{NC}}/\text{Fe-P-N}_4\text{-C}$ . (d) HAADF-STEM image and elements mapping of C, N, P, and Fe in  $\text{Fe}_{\text{NC}}/\text{Fe-P-N}_4\text{-C}$ .

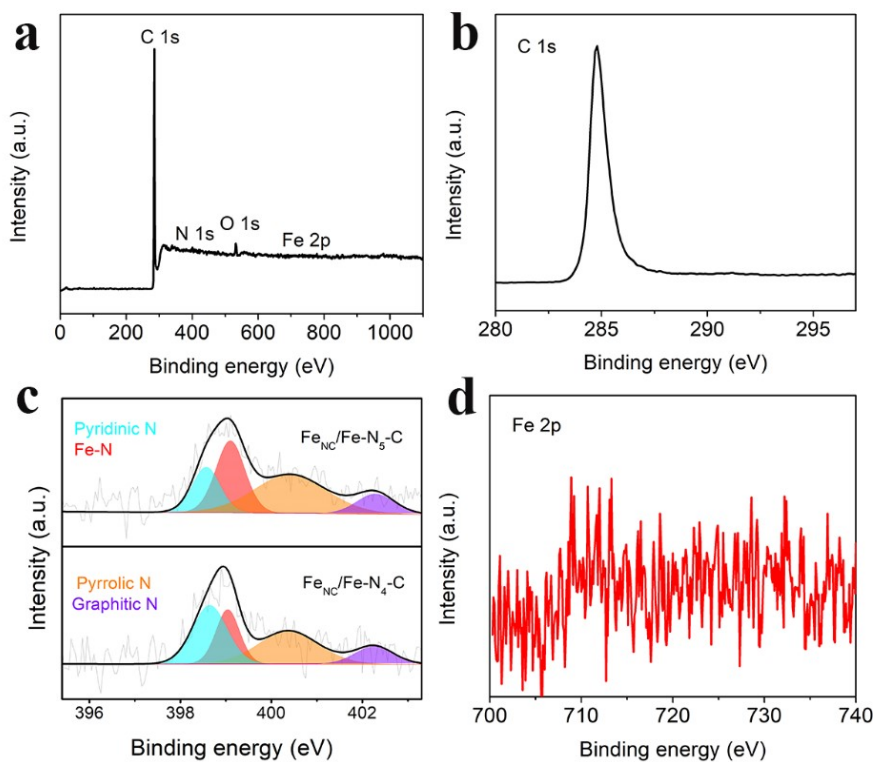

Figure S5. XPS analysis of  $\text{Fe}_{\text{NC}}/\text{Fe-N}_5\text{-C}$ . (a) full spectrum, (b) C 1s, (c) comparison of N 1s between  $\text{Fe}_{\text{NC}}/\text{Fe-N}_5\text{-C}$  and  $\text{Fe}_{\text{NC}}/\text{Fe-N}_4\text{-C}$ , (d) Fe 2p.

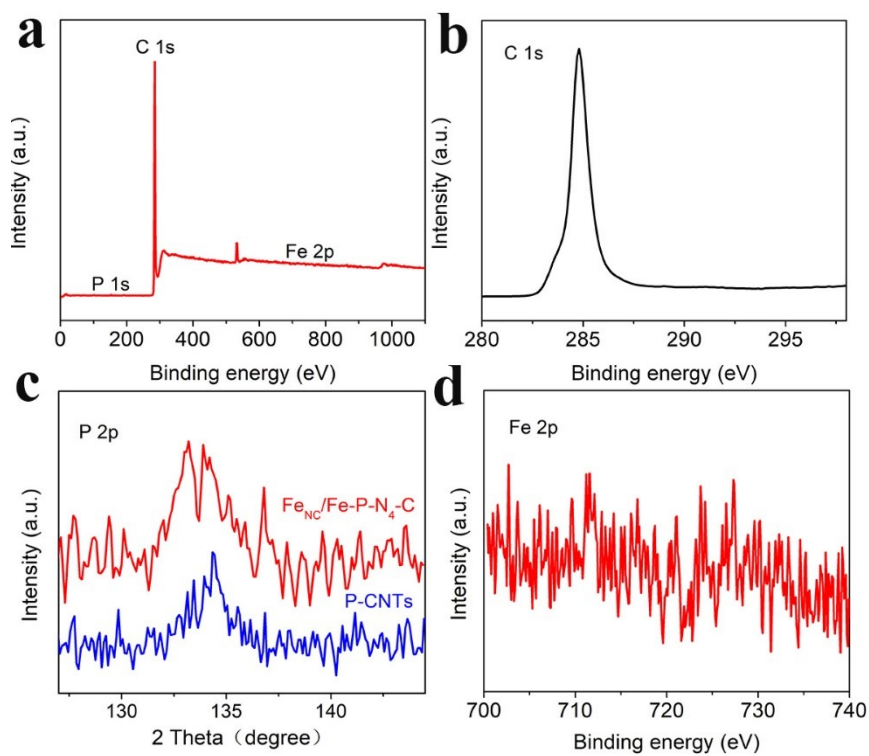

Figure S6. XPS analysis of  $\text{Fe}_{\text{NC}}/\text{Fe-P-N}_4\text{-C}$ . (a) full spectrum, (b) C 1s, (c) comparison of P 2p between  $\text{Fe}_{\text{NC}}/\text{Fe-P-N}_4\text{-C}$  and P-CNTs, (d) Fe 2p.

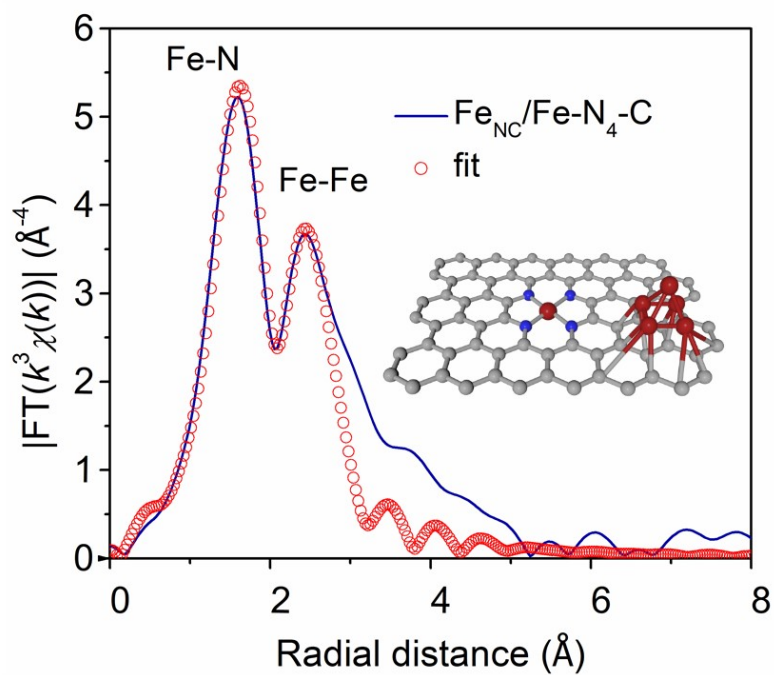

**Figure S7.** The EXAFS curve fitting of Fe<sub>NC</sub>/Fe-N<sub>4</sub>-C catalyst in R space. The inset shows the structure diagram on which the EXAFS fitting process is based.

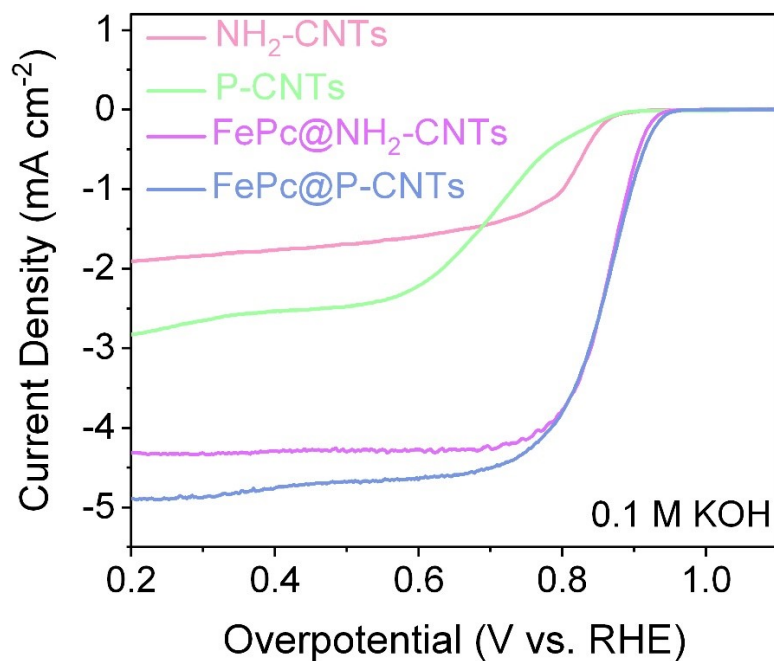

**Figure S8.** LSV curves of NH<sub>2</sub>-CNTs, P-CNTs, FePc@NH<sub>2</sub>-CNTs, and FePc@P-CNTs.



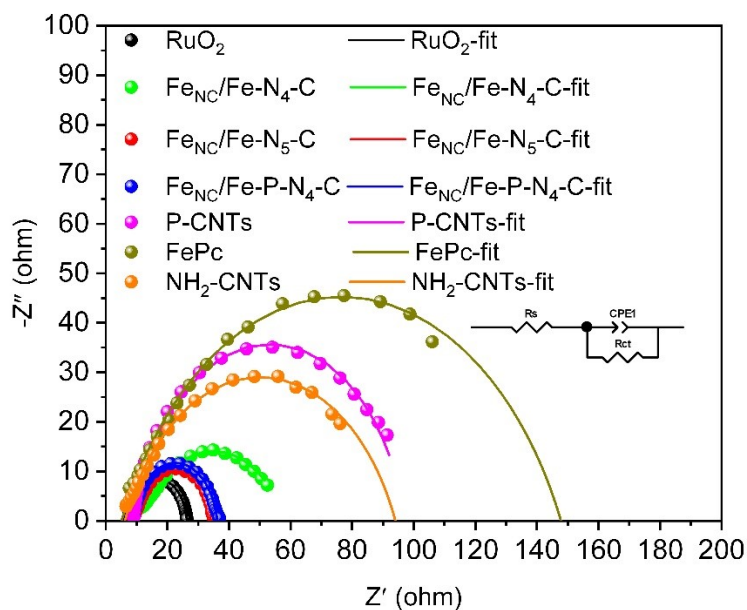

Figure S9. The Nyquist plots of various catalysts.

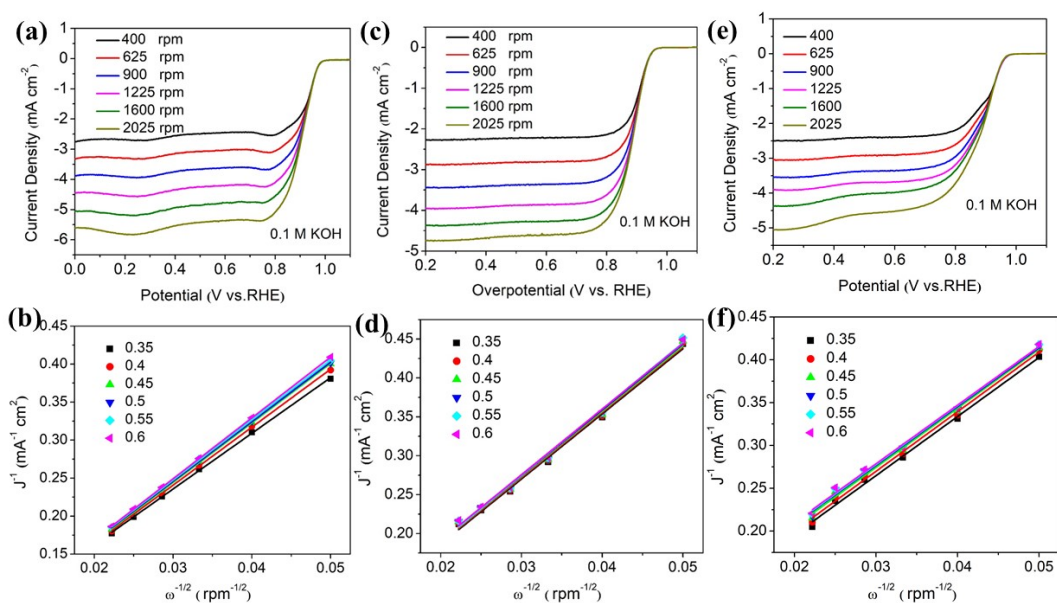

Figure S10. Rotating-disk voltammograms in 0.1 M KOH at  $5 \text{ mV s}^{-1}$  and corresponding Koutecky–Levich plots ( $J^{-1}$  versus  $\omega^{-0.5}$ ) at different potentials: (a, b)  $\text{Fe}_{\text{NC}}/\text{Fe-N}_5\text{-C}$ , (c, d)  $\text{Fe}_{\text{NC}}/\text{Fe-P-N}_4\text{-C}$ , and (e, f)  $\text{Fe}_{\text{NC}}/\text{Fe-N}_4\text{-C}$ .

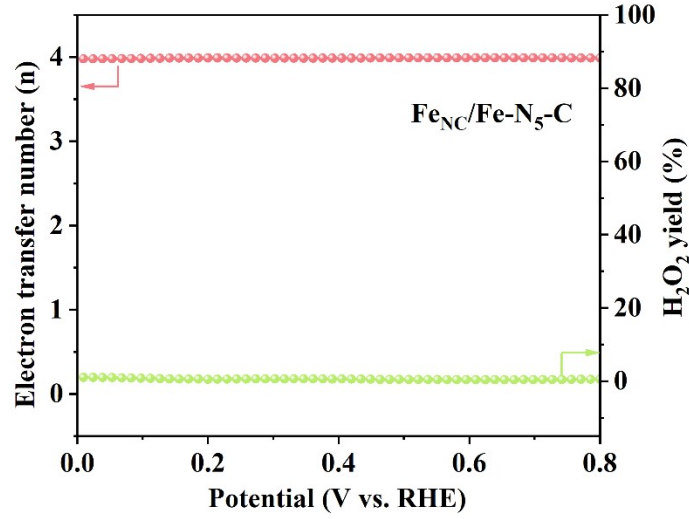

Figure S11. The RRDE results of Fe<sub>NC</sub>/Fe-N<sub>5</sub>-C.

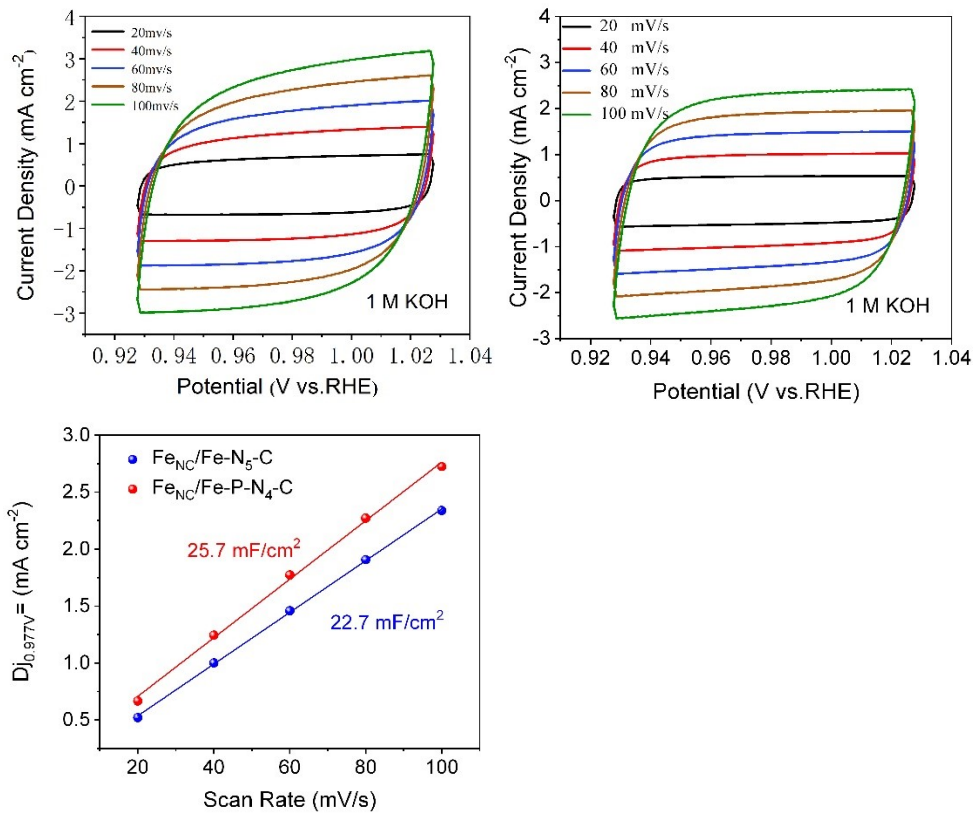

Figure S12. The electrochemical double layer capacitance of Fe<sub>NC</sub>/Fe-N<sub>5</sub>-C and Fe<sub>NC</sub>/Fe-P-N<sub>4</sub>-C.

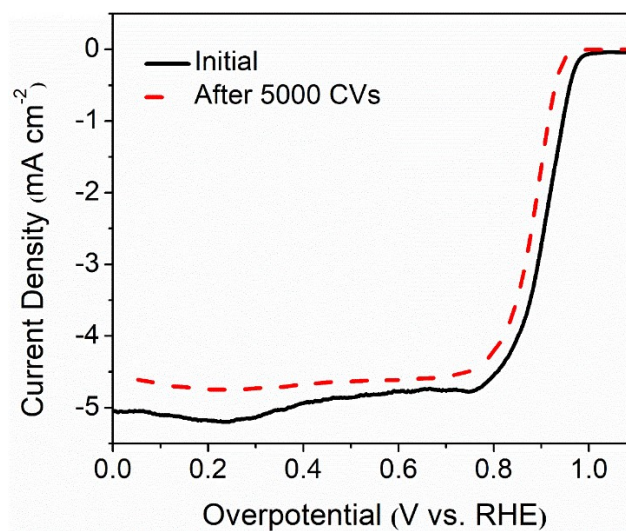

**Figure S13.** ORR polarization plots for  $\text{Fe}_{\text{NC}}/\text{Fe-N}_5\text{-C}$  before and after 5000 CV cycles in  $\text{O}_2$ -saturated 0.1 M KOH.

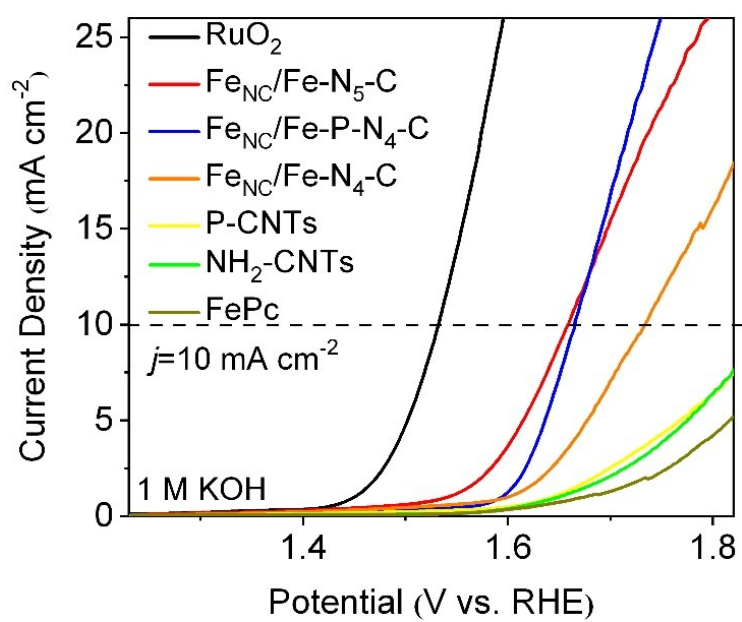

**Figure S14.** OER polarization plots for  $\text{Fe}_{\text{NC}}/\text{Fe-N}_5\text{-C}$ ,  $\text{Fe}_{\text{NC}}/\text{Fe-P-N}_4\text{-C}$ ,  $\text{Fe}_{\text{NC}}/\text{Fe-N}_4\text{-C}$  and other comparison samples.

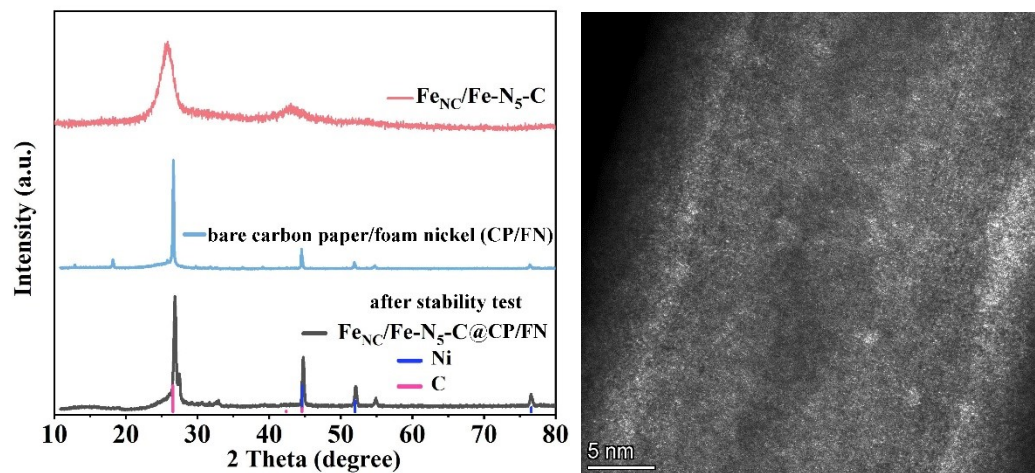

Figure S15. The XRD and AC-HAADF-STEM analysis of Fe<sub>NC</sub>/Fe-N<sub>5</sub>-C after a long-time stability test.

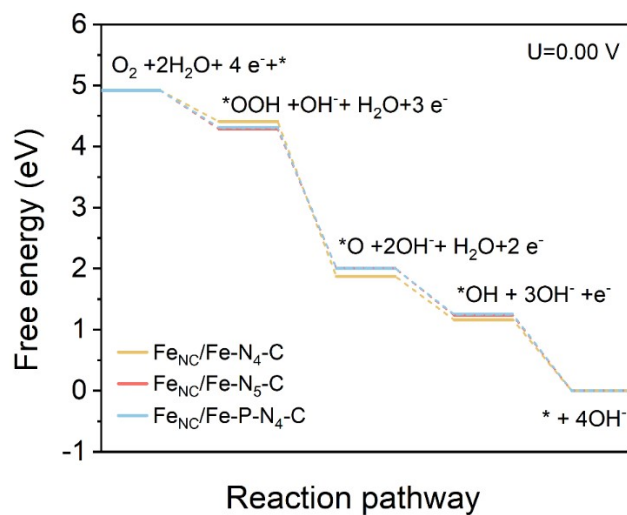

Figure S16. ORR Gibbs free energy diagram of Fe<sub>NC</sub>/Fe-N<sub>4</sub>-C, Fe<sub>NC</sub>/Fe-P-N<sub>4</sub>-C, and Fe<sub>NC</sub>/Fe-N<sub>5</sub>-C at U = 0 V.

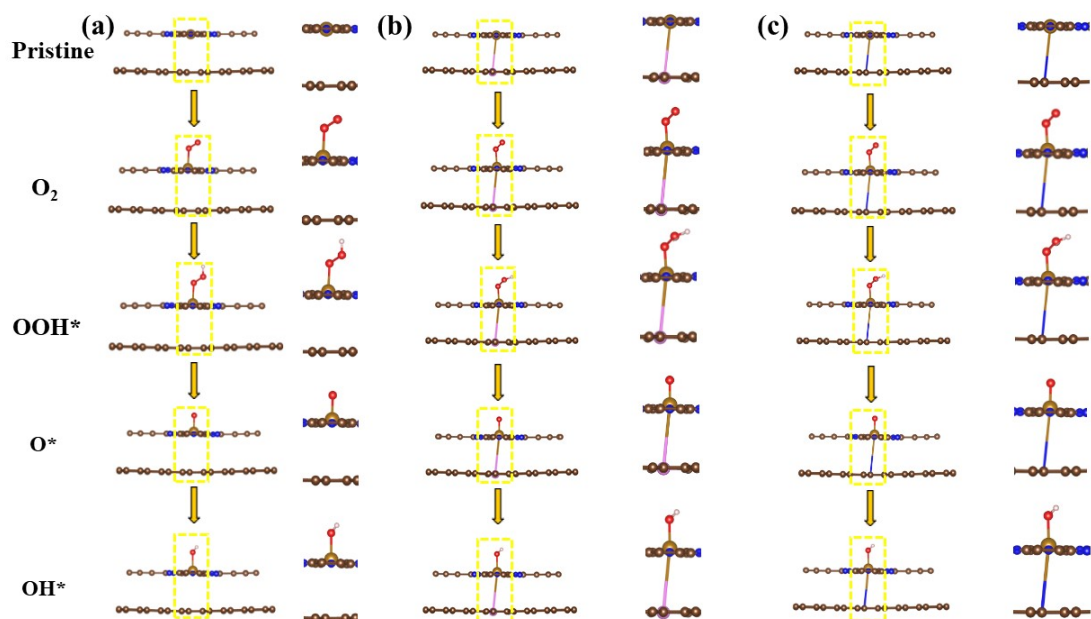

**Figure S17.** DFT optimized structures (side view) of (a) Fe<sub>NC</sub>/Fe-N<sub>4</sub>-C, (b) Fe<sub>NC</sub>/Fe-P-N<sub>4</sub>-C, and (c) Fe<sub>NC</sub>/Fe-N<sub>5</sub>-C, with adsorbed O<sub>2</sub> and ORR intermediates. The magnified view of the labeled region highlights the catalytic process at 4-electron ORR. (O: Red, Fe: Yellow, C: Brown, N: Blue, P: Pink, H: White).

**Table S1.** Comparative ORR performance of as-prepared catalyst with other reported Fe single atom-based ORR catalysts.

| Catalysts                                                | Metal content<br>(wt%) | $E_{\text{onset}}$<br>(V vs RHE) | $E_{1/2}$<br>(V vs RHE) | Reference |
|----------------------------------------------------------|------------------------|----------------------------------|-------------------------|-----------|
| $\text{Fe}_{\text{NC}}/\text{Fe-N}_5\text{-C}$           | 3.16 (ICP-OES)         | 0.986                            | 0.906                   | This work |
| $\text{Fe}_{\text{NC}}/\text{Fe-N}_4\text{-C}$           | 2.86 (ICP-OES)         | 0.979                            | 0.864                   | This work |
| $\text{FePc}@/\text{CeO}_2/\text{NSCNF}$                 | 2.15 (ICP-MS)          | 1.00                             | 0.890                   | [5]       |
| Fe-N-C-2                                                 | -                      | 0.98                             | 0.81                    | [6]       |
| $\text{Fe}_3\text{C}@/\text{NCNTs}$                      | -                      | 0.96                             | 0.84                    | [7]       |
| Fe-SA/NC                                                 | 0.93 (ICP-OES)         | 1.10                             | 0.905                   | [8]       |
| Fe-N-C/GC                                                | 1.74 (ICP-OES)         | -                                | 0.86                    | [9]       |
| $\text{M-Fe}_2\text{O}_3/\text{Fe}_{\text{SA}}@\text{N}$ | 1.2 (ICP-OES)          | 1.05                             | 0.85                    | [10]      |
| $\text{ZIF8}@/\text{FePMPDA-920}$                        | 1.25 (ICP-OES)         | 1.03                             | 0.90                    | [11]      |
| $\text{Fe-N}_5\text{-LS}$                                | 2.69 (ICP-OES)         | -                                | 0.88                    | [12]      |
| Fe-N-C-2                                                 | 4.5 (ICP-MS)           | -                                | 0.901                   | [13]      |
| $\text{FeNC-VN}$                                         | -                      | 0.990                            | 0.902                   | [14]      |

**Table S2.** ICP-OES results of Fe content in catalysts.

| Samples                                          | Fe content (wt %) |
|--------------------------------------------------|-------------------|
| $\text{Fe}_{\text{NC}}/\text{Fe-N}_5\text{-C}$   | 3.16%             |
| $\text{Fe}_{\text{NC}}/\text{Fe-N}_4\text{-C}$   | 2.86%             |
| $\text{Fe}_{\text{NC}}/\text{Fe-P-N}_4\text{-C}$ | 2.82%             |

## References:

- [1] BLÖCHL P E. Projector augmented-wave method [J]. *Physical review B*, 1994, 50(24): 17953.
- [2] KOZLOV A N-E S M, VIÑES F, ILLAS F. Electronic-structure-based chemical descriptors:(in) dependence on self-interaction and Hartree-Fock exchange [J]. *Phys Rev B*, 1996, 54: 11169-86.
- [3] KRESSE G, FURTHMÜLLER J. Efficiency of ab-initio total energy calculations for metals and semiconductors using a plane-wave basis set [J]. *Computational materials science*, 1996, 6(1): 15-50.
- [4] PULAY P. Convergence acceleration of iterative sequences. The case of SCF iteration [J]. *Chemical Physics Letters*, 1980, 73(2): 393-8.
- [5] TAO S, XIANG S, YU Y, et al. Regulating electron region of central Fe atom in iron phthalocyanine by N, S-doped carbon nanofibers as efficient oxygen reduction catalysts for high-performance Zn-air battery [J]. *Carbon*, 2024, 220.
- [6] JIANG Y, XU H, MA B, et al. Polypyrrole derived carbon nanotube aerogel based single-site Fe-N-C catalyst with superior ORR activity and durability [J]. *Fuel*, 2024, 366.
- [7] XU C, GUO C, LIU J, et al. Accelerating the oxygen adsorption kinetics to regulate the oxygen reduction catalysis via Fe<sub>3</sub>C nanoparticles coupled with single Fe-N<sub>4</sub> sites [J]. *Energy Storage Materials*, 2022, 51: 149-58.
- [8] YANG L, ZHU Y, YAO X, et al. Surface-optimized carbon nanocages with tailorable atomic Fe-N<sub>4</sub> sites to boost oxygen reduction in long stable zinc-air battery [J]. *Energy Storage Materials*, 2023, 63.
- [9] XING G, ZHANG G, WANG B, et al. Strengthening oxygen reduction activity based on the cooperation of pyridinic-N and graphitic-N for atomically dispersed Fe sites [J]. *Journal of Materials Chemistry A*, 2023, 11(17): 9493-503.
- [10] ZHANG F, ZHU Y, ZHONG Y, et al. Tuning the charge distribution and crystal field of iron single atoms via iron oxide integration for enhanced oxygen reduction reaction in zinc-air batteries [J]. *Journal of Energy Chemistry*, 2023, 85: 154-63.
- [11] ZHOU S, CHEN C, XIA J, et al. 3D Hollow Hierarchical Porous Carbon with Fe-N<sub>4</sub>-OH Single-Atom Sites for High-Performance Zn-Air Batteries [J]. *Small*, 2023, 19(48).
- [12] XUE D, YUAN P, JIANG S, et al. Altering the spin state of Fe-N-C through

ligand field modulation of single-atom sites boosts the oxygen reduction reaction [J]. *Nano Energy*, 2023, 105.

[13] TU H, ZHANG H, SONG Y, et al. Electronic Asymmetry Engineering of Fe–N–C Electrocatalyst via Adjacent Carbon Vacancy for Boosting Oxygen Reduction Reaction [J]. *Advanced Science*, 2023, 10(32).

[14] LYU L, HU X, LEE S, et al. Oxygen Reduction Kinetics of Fe–N–C Single Atom Catalysts Boosted by Pyridinic N Vacancy for Temperature-Adaptive Zn–Air Batteries [J]. *Journal of the American Chemical Society*, 2024, 146(7): 4803-13.
